# Supplementary material for: Global economic impacts of COVID-19 lockdown measures stand out in high-frequency shipping data
Source: PubMed Central journal article supplement (PMC8046185; doi:10.1371/journal.pone.0248818), 2021-04-14
Supplement: pone.0248818.s003.pdf [file pone.0248818.s003.pdf]

**S1 Table. The top 20 largest negative maritime trade losses on a country-level.** The total trade losses and imports and export losses expressed in million tonnes (MT). The losses cover the period Jan-Aug 2020 compared to Jan-Aug 2019.

| Rank | Total trade          |             | Imports              |             | Exports              |             |
|------|----------------------|-------------|----------------------|-------------|----------------------|-------------|
|      | Country              | Change (MT) | Country              | Change (MT) | Country              | Change (MT) |
| 1    | China                | -342.4      | China                | -217.8      | China                | -124.6      |
| 2    | Saudi Arabia         | -98.3       | United States        | -32.4       | Saudi Arabia         | -99.1       |
| 3    | United States        | -91.3       | Netherlands          | -28.6       | Australia            | -60.7       |
| 4    | Australia            | -65.1       | Japan                | -17.7       | United States        | -58.9       |
| 5    | United Arab Emirates | -47.3       | India                | -14.2       | Brazil               | -39.5       |
| 6    | Netherlands          | -46.2       | United Arab Emirates | -9.8        | United Arab Emirates | -37.6       |
| 7    | Brazil               | -44.2       | Italy                | -8.8        | Japan                | -18.8       |
| 8    | Japan                | -36.5       | Mexico               | -8.5        | Russia               | -18.7       |
| 9    | Canada               | -21.9       | Great Britain        | -8.3        | Netherlands          | -17.6       |
| 10   | Russia               | -20.3       | Belgium              | -7.2        | Columbia             | -16.2       |
| 11   | Columbia             | -17.1       | Kuwait               | -7.1        | Canada               | -15.5       |
| 12   | Peru                 | -16.9       | Canada               | -6.3        | Peru                 | -13.0       |
| 13   | Italy                | -16.4       | Brazil               | -4.7        | Malaysia             | -9.7        |
| 14   | Malaysia             | -13.0       | South-Korea          | -4.6        | South-Africa         | -8.1        |
| 15   | South-Korea          | -12.5       | Australia            | -4.4        | South-Korea          | -8.0        |
| 16   | Belgium              | -11.9       | France               | -4.3        | Libya                | -7.9        |
| 17   | Mexico               | -11.9       | Iran                 | -4.0        | Italy                | -7.7        |
| 18   | Kuwait               | -10.8       | Peru                 | -3.8        | Ukraine              | -6.9        |
| 19   | Great Britain        | -9.1        | Egypt                | -3.8        | Singapore            | -6.5        |
| 20   | Thailand             | -8.6        | Thailand             | -3.5        | Indonesia            | -6.0        |
