# Supplementary material for: Global economic impacts of COVID-19 lockdown measures stand out in high-frequency shipping data
Source: PubMed Central journal article supplement (PMC8046185; doi:10.1371/journal.pone.0248818), 2021-04-14
Supplement: pone.0248818.s004.pdf [file pone.0248818.s004.pdf]

# PLOS ONE

## The implications of large-scale containments policies on global maritime trade during the COVID-19 pandemic --Manuscript Draft--

|                                                                                                                                                                                                                                                                                                                                                                                                                                                                         |                                                                                                                                                                                                                                                                                                                                                                                                                                                                                                                                                                                                                                                                                                                                                                                                                                                                                                                                                                                                                                                                                                                                                                                                                                                                                                                                                                                                                                                                                                                                                            |
|-------------------------------------------------------------------------------------------------------------------------------------------------------------------------------------------------------------------------------------------------------------------------------------------------------------------------------------------------------------------------------------------------------------------------------------------------------------------------|------------------------------------------------------------------------------------------------------------------------------------------------------------------------------------------------------------------------------------------------------------------------------------------------------------------------------------------------------------------------------------------------------------------------------------------------------------------------------------------------------------------------------------------------------------------------------------------------------------------------------------------------------------------------------------------------------------------------------------------------------------------------------------------------------------------------------------------------------------------------------------------------------------------------------------------------------------------------------------------------------------------------------------------------------------------------------------------------------------------------------------------------------------------------------------------------------------------------------------------------------------------------------------------------------------------------------------------------------------------------------------------------------------------------------------------------------------------------------------------------------------------------------------------------------------|
| <b>Manuscript Number:</b>                                                                                                                                                                                                                                                                                                                                                                                                                                               | PONE-D-20-33893                                                                                                                                                                                                                                                                                                                                                                                                                                                                                                                                                                                                                                                                                                                                                                                                                                                                                                                                                                                                                                                                                                                                                                                                                                                                                                                                                                                                                                                                                                                                            |
| <b>Article Type:</b>                                                                                                                                                                                                                                                                                                                                                                                                                                                    | Research Article                                                                                                                                                                                                                                                                                                                                                                                                                                                                                                                                                                                                                                                                                                                                                                                                                                                                                                                                                                                                                                                                                                                                                                                                                                                                                                                                                                                                                                                                                                                                           |
| <b>Full Title:</b>                                                                                                                                                                                                                                                                                                                                                                                                                                                      | The implications of large-scale containments policies on global maritime trade during the COVID-19 pandemic                                                                                                                                                                                                                                                                                                                                                                                                                                                                                                                                                                                                                                                                                                                                                                                                                                                                                                                                                                                                                                                                                                                                                                                                                                                                                                                                                                                                                                                |
| <b>Short Title:</b>                                                                                                                                                                                                                                                                                                                                                                                                                                                     | The implications of large-scale containments policies on global maritime trade during the COVID-19 pandemic                                                                                                                                                                                                                                                                                                                                                                                                                                                                                                                                                                                                                                                                                                                                                                                                                                                                                                                                                                                                                                                                                                                                                                                                                                                                                                                                                                                                                                                |
| <b>Corresponding Author:</b>                                                                                                                                                                                                                                                                                                                                                                                                                                            | Jasper Verschuur<br>University of Oxford<br>Oxford, UNITED KINGDOM                                                                                                                                                                                                                                                                                                                                                                                                                                                                                                                                                                                                                                                                                                                                                                                                                                                                                                                                                                                                                                                                                                                                                                                                                                                                                                                                                                                                                                                                                         |
| <b>Keywords:</b>                                                                                                                                                                                                                                                                                                                                                                                                                                                        | COVID19; economic impacts; maritime trade; automatic identification system; containment measures                                                                                                                                                                                                                                                                                                                                                                                                                                                                                                                                                                                                                                                                                                                                                                                                                                                                                                                                                                                                                                                                                                                                                                                                                                                                                                                                                                                                                                                           |
| <b>Abstract:</b>                                                                                                                                                                                                                                                                                                                                                                                                                                                        | The implementation of large-scale containment measures by governments to contain the spread of the COVID-19 virus has resulted in a large supply and demand shock throughout the global economy. Here, we use empirical vessel tracking data and a newly developed algorithm to estimate the global maritime trade losses during the first eight months of the pandemic. Our results show widespread trade losses on a port level with the largest absolute losses found for ports in China, the Middle-East and Western Europe, associated with the collapse of specific supply-chains (e.g. oil, vehicle manufacturing). In total, we estimate that global maritime trade reduced by -7.0% to -9.6% during the first eight months of 2020, which is equal to around 206-286 million tonnes in volume losses and up to 225-412 billion USD in value losses. The fishery, mining and quarrying, electrical equipment and machinery manufacturing, and transport equipment manufacturing sectors are hit hardest, with losses up to 11.8%. Moreover, we find a large geographical disparity in losses, with some small islands developing states and low-income economies suffering the largest relative trade losses. We find a clear negative impact of COVID-19 related business and public transport closures on country-wide exports. Overall, we show how real-time indicators of economic activity can support governments and international organisations in economic recovery efforts and allocate funds to the hardest hit economies and sectors. |
| <b>Order of Authors:</b>                                                                                                                                                                                                                                                                                                                                                                                                                                                | Jasper Verschuur<br>Elco Koks<br>Jim Hall                                                                                                                                                                                                                                                                                                                                                                                                                                                                                                                                                                                                                                                                                                                                                                                                                                                                                                                                                                                                                                                                                                                                                                                                                                                                                                                                                                                                                                                                                                                  |
| <b>Additional Information:</b>                                                                                                                                                                                                                                                                                                                                                                                                                                          |                                                                                                                                                                                                                                                                                                                                                                                                                                                                                                                                                                                                                                                                                                                                                                                                                                                                                                                                                                                                                                                                                                                                                                                                                                                                                                                                                                                                                                                                                                                                                            |
| <b>Question</b>                                                                                                                                                                                                                                                                                                                                                                                                                                                         | <b>Response</b>                                                                                                                                                                                                                                                                                                                                                                                                                                                                                                                                                                                                                                                                                                                                                                                                                                                                                                                                                                                                                                                                                                                                                                                                                                                                                                                                                                                                                                                                                                                                            |
| <b>Financial Disclosure</b><br><br>Enter a financial disclosure statement that describes the sources of funding for the work included in this submission. Review the <a href="#">submission guidelines</a> for detailed requirements. View published research articles from <a href="#">PLOS ONE</a> for specific examples.<br><br>This statement is required for submission and <b>will appear in the published article</b> if the submission is accepted. Please make | This research is supported by the University of Oxford COVID-19 Research Response Fund. J.V. acknowledges funding from the Engineering and Physical Sciences Research Council (EPSRC, <a href="https://epsrc.ukri.org">https://epsrc.ukri.org</a> ) under grant number EP/R513295/1.<br><br>The funders had no role in study design, data collection and analysis, decision to publish, or preparation of the manuscript.                                                                                                                                                                                                                                                                                                                                                                                                                                                                                                                                                                                                                                                                                                                                                                                                                                                                                                                                                                                                                                                                                                                                  |

sure it is accurate.

#### Unfunded studies

Enter: *The author(s) received no specific funding for this work.*

#### Funded studies

Enter a statement with the following details:

- Initials of the authors who received each award
- Grant numbers awarded to each author
- The full name of each funder
- URL of each funder website
- Did the sponsors or funders play any role in the study design, data collection and analysis, decision to publish, or preparation of the manuscript?
- **NO** - Include this sentence at the end of your statement: *The funders had no role in study design, data collection and analysis, decision to publish, or preparation of the manuscript.*
- **YES** - Specify the role(s) played.

\* typeset

#### Competing Interests

Use the instructions below to enter a competing interest statement for this submission. On behalf of all authors, disclose any [competing interests](#) that could be perceived to bias this work—acknowledging all financial support and any other relevant financial or non-financial competing interests.

This statement **will appear in the published article** if the submission is accepted. Please make sure it is accurate. View published research articles from [PLOS ONE](#) for specific examples.

The authors have declared that no competing interests exist.

**NO authors have competing interests**

Enter: *The authors have declared that no competing interests exist.*

**Authors with competing interests**

Enter competing interest details beginning with this statement:

*I have read the journal's policy and the authors of this manuscript have the following competing interests: [insert competing interests here]*

\* typeset

**Ethics Statement**

N/A

Enter an ethics statement for this submission. This statement is required if the study involved:

- Human participants
- Human specimens or tissue
- Vertebrate animals or cephalopods
- Vertebrate embryos or tissues
- Field research

Write "N/A" if the submission does not require an ethics statement.

General guidance is provided below. Consult the [submission guidelines](#) for detailed instructions. **Make sure that all information entered here is included in the Methods section of the manuscript.**

**Format for specific study types**

**Human Subject Research (involving human participants and/or tissue)**

- Give the name of the institutional review board or ethics committee that approved the study
- Include the approval number and/or a statement indicating approval of this research
- Indicate the form of consent obtained (written/oral) or the reason that consent was not obtained (e.g. the data were analyzed anonymously)

**Animal Research (involving vertebrate animals, embryos or tissues)**

- Provide the name of the Institutional Animal Care and Use Committee (IACUC) or other relevant ethics board that reviewed the study protocol, and indicate whether they approved this research or granted a formal waiver of ethical approval
- Include an approval number if one was obtained
- If the study involved *non-human primates*, add *additional details* about animal welfare and steps taken to ameliorate suffering
- If anesthesia, euthanasia, or any kind of animal sacrifice is part of the study, include briefly which substances and/or methods were applied

**Field Research**

Include the following details if this study involves the collection of plant, animal, or other materials from a natural setting:

- Field permit number
- Name of the institution or relevant body that granted permission

**Data Availability**

Authors are required to make all data underlying the findings described fully available, without restriction, and from the time of publication. PLOS allows rare exceptions to address legal and ethical concerns. See the [PLOS Data Policy](#) and [FAQ](#) for detailed information.

Yes - all data are fully available without restriction

A Data Availability Statement describing where the data can be found is required at submission. Your answers to this question constitute the Data Availability Statement and **will be published in the article**, if accepted.

**Important:** Stating 'data available on request from the author' is not sufficient. If your data are only available upon request, select 'No' for the first question and explain your exceptional situation in the text box.

Do the authors confirm that all data underlying the findings described in their manuscript are fully available without restriction?

**Describe where the data may be found in full sentences. If you are copying our sample text, replace any instances of XXX with the appropriate details.**

- If the data are **held or will be held in a public repository**, include URLs, accession numbers or DOIs. If this information will only be available after acceptance, indicate this by ticking the box below. For example: *All XXX files are available from the XXX database (accession number(s) XXX, XXX).*
- If the data are all contained **within the manuscript and/or Supporting Information files**, enter the following: *All relevant data are within the manuscript and its Supporting Information files.*
- If neither of these applies but you are able to provide **details of access elsewhere**, with or without limitations, please do so. For example:

*Data cannot be shared publicly because of [XXX]. Data are available from the XXX Institutional Data Access / Ethics Committee (contact via XXX) for researchers who meet the criteria for access to confidential data.*

*The data underlying the results presented in the study are available from (include the name of the third party*

All the derived datasets that can reproduce the results can be accessed from Zenodo: 10.5281/zenodo.4146993

|                                                                                                                                                                                                                                         |                                                                                                                                                                                  |
|-----------------------------------------------------------------------------------------------------------------------------------------------------------------------------------------------------------------------------------------|----------------------------------------------------------------------------------------------------------------------------------------------------------------------------------|
| <p><i>and contact information or URL).</i></p> <ul style="list-style-type: none"><li>• This text is appropriate if the data are owned by a third party and authors do not have permission to share the data.</li></ul> <p>* typeset</p> |                                                                                                                                                                                  |
| Additional data availability information:                                                                                                                                                                                               | Tick here if the URLs/accession numbers/DOIs will be available only after acceptance of the manuscript for publication so that we can ensure their inclusion before publication. |

1 The implications of large-scale containments policies on global maritime trade during  
2 the COVID-19 pandemic

3

4 J.Verschuur<sup>1,\*</sup>, E.E. Koks<sup>1,2</sup> and J.W. Hall<sup>1</sup>

5

6 <sup>1</sup>Environmental Change Institute, University of Oxford, Oxford, United Kingdom

7 <sup>2</sup>Institute for Environmental Studies, Vrije Universiteit Amsterdam, Amsterdam,  
8 Netherlands

9

10 \*Corresponding author

11 Email: [jasper.verschuur@keble.ox.ac.uk](mailto:jasper.verschuur@keble.ox.ac.uk) (JV)

12

13

14

15

16

17

18

19

20

21

22

23

24

25

26

## 27 **Abstract**

28 **The implementation of large-scale containment measures by governments to**  
29 **contain the spread of the COVID-19 virus has resulted in a large supply and**  
30 **demand shock throughout the global economy. Here, we use empirical vessel**  
31 **tracking data and a newly developed algorithm to estimate the global maritime**  
32 **trade losses during the first eight months of the pandemic. Our results show**  
33 **widespread trade losses on a port level with the largest absolute losses found**  
34 **for ports in China, the Middle-East and Western Europe, associated with the**  
35 **collapse of specific supply-chains (e.g. oil, vehicle manufacturing). In total, we**  
36 **estimate that global maritime trade reduced by -7.0% to -9.6% during the first**  
37 **eight months of 2020, which is equal to around 206-286 million tonnes in volume**  
38 **losses and up to 225-412 billion USD in value losses. The fishery, mining and**  
39 **quarrying, electrical equipment and machinery manufacturing, and transport**  
40 **equipment manufacturing sectors are hit hardest, with losses up to 11.8%.**  
41 **Moreover, we find a large geographical disparity in losses, with some small**  
42 **islands developing states and low-income economies suffering the largest**  
43 **relative trade losses. We find a clear negative impact of COVID-19 related**  
44 **business and public transport closures on country-wide exports. Overall, we**  
45 **show how real-time indicators of economic activity can support governments**  
46 **and international organisations in economic recovery efforts and allocate funds**  
47 **to the hardest hit economies and sectors.**

48

49

50

51



## 52 Introduction

53 The emergence and spread of COVID-19, caused by the severe acute respiratory  
54 syndrome coronavirus 2 (SARS-CoV-2), has forced countries worldwide to implement  
55 large-scale containment measures to reduce the spread of the virus [1–4]. These  
56 measures, which include among others international travel restrictions, business  
57 closures, prohibition of large-scale private and public gatherings, and mandatory  
58 quarantines, have shown to effectively reduce the rate of transmission of the virus  
59 [1,3,5]. As a consequence, however, such policies have had large economic  
60 repercussions, both in terms of domestic industry output and international trade, due  
61 to diminishing production and reduced demand for some products. The resulting  
62 demand and supply shocks has further cascaded through complex supply-chains  
63 networks, causing spill-over effects to downstream and upstream suppliers,  
64 domestically and internationally [6–8].

65

66 Previous research has intended to estimate the global macroeconomic impacts of  
67 enforcement measures worldwide using model-based approaches, in particular input-  
68 output (I-O) analysis and computable general equilibrium (CGE) models [6–9]. For  
69 instance, Inoue and Todo [8] estimate that an one month lockdown of Tokyo may lead  
70 to a 5.2% contraction of the annual gross domestic production (GDP) of Japan. Lenzen  
71 *et al.* [7] estimate the global macroeconomic losses to be around 4.2% of GDP,  
72 whereas Guan *et al.* [6] estimate the losses in global value-added to be between 25-  
73 40.3%, depending on the modelling scenario adopted. In addition, the World Trade  
74 Organisation (WTO) projects that global international trade will contract by 13-32% in  
75 2020 under a number of scenarios of disruptions to economic activity [10]. However,  
76 the accuracy of these model-based estimates critically hinge on setting realistic

77 scenarios of the economic impacts and understanding how supply-chain dynamics  
78 disrupt or buffer shocks. This includes making assumptions how enforcement policies  
79 impact economies and predicting how countries recover from their economic downturn.  
80 Given the large heterogeneity in containment policies implemented, in terms of  
81 severity, duration and enforcements [1,11], alongside the complexity of shock  
82 propagation through interconnected networks [12,13], the extent to which such model-  
83 based approaches can predict the nature and scale of the economic impact currently  
84 remains to be seen. Moreover, there is a lack of real-time global observational data to  
85 validate and steer model projections, which may cause ill-informed decision-making or  
86 misallocation of funds [5]. For instance, trade statistics, published by national statistical  
87 agencies, are usually produced with some delay and are more comprehensive for  
88 OECD countries. Hence, alternative data sources are needed to provide real-time  
89 indicators of economic activity in order to fill existing data gaps and identify trends. For  
90 instance, a report by UNCTAD [14] estimated that in the first half of 2020, global port  
91 calls have declined by 8.7%, with the largest drop estimated to be in Europe, Australia  
92 and Oceania.

93

94 Here, we use a novel dataset derived from empirical vessel tracking data in  
95 combination with a newly developed algorithm to estimates the changes in  
96 international maritime trade flows during the outbreak of the COVID-19 pandemic.  
97 Maritime trade flows cover around 80% of the world's trade in terms of volume [15],  
98 and can hence be used as a first-order indicator of the status of economic activity in a  
99 country. The newly derived dataset has a high spatial (166 countries) and temporal  
100 (daily) resolution, which helps to track the impacts of the COVID-19 outbreak the global  
101 economy, and the geographical disparity of impacts. To assess the impacts, we first

102 quantify the total trade losses and gains for ports and countries for the period January-  
103 August by comparing the 2020 data to the same period in 2019. Second, we provide a  
104 sector-level disaggregation to show how certain sectors have been disproportionately  
105 affected by supply and demand changes. Third, we use a panel regression model with  
106 fixed effects to estimate the impacts of specific containment policies on exports by  
107 making use of the heterogeneity in the diversity, timing and severity of containment  
108 measures across countries. Overall, we provide evidence how the impacts to global  
109 trade are complex and dependent on the trade-dependencies, sector-composition and  
110 policies implemented. The results provide timely information about which economies  
111 are hit hardest, thereby helping decision-makers effectively target and prioritize  
112 international aid and economic stimulus.

113

## 114 **Method**

### 115 **Data and trade estimation**

116 We derive estimates of port-level trade flows (imports and exports) for 1153 ports  
117 across 166 countries worldwide using the geospatial location and attributes of maritime  
118 vessels (from January 2019 - August 2020). To do this, we use Automatic Identification  
119 System (AIS) data, which provides detailed data on the location, speed, direction and  
120 vessel characteristics of all trade-carrying vessels with an AIS transponder (that send  
121 information to terrestrial or satellite receivers every few seconds-minutes) [16]. This  
122 data was obtained through a partnership with the UN Global Platform AIS Task Team  
123 initiative (<https://unstats.un.org/wiki/display/AIS/>), which aims to develop algorithms  
124 and methodologies to make AIS data useful for a variety of fields and applications  
125 (traffic, economic trade, fisheries, CO2 emissions).

126 We develop an algorithm (S1 Appendix) that estimates the trade flows based on the  
127 ingoing and outgoing movements of maritime vessels (~3.2 million port calls across  
128 100,000 unique vessels) and their characteristics (e.g. dimensions, utilisation rate,  
129 vessel type), going on to disaggregate these trade flows into specific sectors (11 sector  
130 classification adopted here). We end up with daily sector-specific trade flow estimates  
131 on a port-level, which we aggregate to a country-scale to perform the country-wide  
132 impact analysis. This new algorithm significantly advances previous work [17–19] by  
133 providing a global scale analysis and being able to provide a sector decomposition.  
134 We validate the results (S1 Appendix) by comparing the derived trade estimates to  
135 detailed port-level trade data obtained for five countries (Japan, United Kingdom,  
136 United States, New Zealand, Brazil). Moreover, we compare our estimates to country-  
137 wide maritime trade flows obtained from UN Comtrade [20] mode of transport data for  
138 27 countries.

139

## 140 **Econometric model**

141 The variation in trade losses among countries are driven by the differences in  
142 containment measures introduced by countries (in terms of timing, duration, and  
143 severity) [5], and due to supply shortages to domestic supply-chains and demand  
144 reductions in trade-dependent economies [6]. Large-scale containment measures can  
145 directly negatively influence industry output by affecting business operations (e.g.  
146 workplace closure, mobility restrictions), or indirectly positively affect industry output  
147 through effectively containing the virus outbreak and thereby allowing industrial  
148 production processes and transportation of goods to continue. To study the  
149 implications of large-scale containment measures on exports (which we use as a proxy  
150 of industrial output), we match our daily, country-wide, estimates with data from the

151 Oxford COVID-19 Government Response Tracker (OxCGRT) [21]. Within OxCGRT,  
152 data is collected on the implementation and stringency of containment measures  
153 across 160 countries. We utilise reduced-form econometric techniques [22] to estimate  
154 the effect of different containment policies on exports across a balanced sample of 122  
155 countries. We express export change as the percentage change in detrended exports  
156 in 2020 compared to 2019 (S2 Appendix), which therefore controls for potential  
157 seasonality and trends in the data. The time series is first smoothed using a 10-day  
158 moving average in order to remove the daily noise and better capture the underlying  
159 signal. We further control (see S2 Appendix for discussion) for several factors on a  
160 daily-scale, including the number of confirmed cases as a fraction of the population,  
161 reduction in demand in trade-dependent countries, the potential reduction in exports  
162 due to supply-shortages (through imports that are used for exports, see Hummels et  
163 al. [23]), and other endogenous factors that are likely to be serially correlated with  
164 exports (which we control for by adding a lag of the export change).

165 From the OxCGRT [21], we obtained information on nine measures that potentially  
166 affect business operations: C1 - School closing; C2 - Workplace closing; C3 - cancel  
167 public events; C4 - Restrictions on gatherings; C5 - Close public transport; C6 - Stay  
168 at home; C7 - Restrictions on internal movement; C8 - International travel controls; H2  
169 - Testing policy. We scale the severity of the policies on a scale between 0 and 1,  
170 thereby assuming a linear relationship between maritime exports and the severity of  
171 policies. Moreover, we create a composite stringency index (Stringency) of all policies  
172 (C1-C8) by adding all individual policies together and rescaling the index between 0  
173 and 1. We performed multiple robustness checks to evaluate the influence of different  
174 model specifications (see S2 Appendix).

175

## 176 **Results**

### 177 **Model validation**

178 We find a good fit between the values predicted by our algorithm and the reported trade  
179 flows on a port-level (correlation coefficient between 0.52-0.96) and a country-level  
180 (correlation coefficient between 0.79-0.98), with a general overestimation for smaller  
181 ports, and ports and countries with large trade imbalances (e.g. small islands). For the  
182 external validation data, we find correlation coefficients of 0.84-0.86 for the aggregated  
183 trade data and 0.73-0.73 for the sector-specific trade data (on a country level). Again,  
184 smaller trade flows are harder to predict. The accuracy of the method is also found to  
185 be dependent on the coverage of information in the AIS data (some attributes are  
186 manually put in), especially information on the vessel draft, which is less frequently  
187 reported in developing countries.

188

### 189 **Port-level trade flows**

190 In the first eight months of 2020, the number of port calls across all ports reduced by  
191 4.4% compared to same months in 2019. Fig 1a shows the average change in total  
192 trade (imports + exports) in terms of volume (in million tonnes, MT) over the months  
193 January-August. The vast majority of ports have experienced a decline in total trade,  
194 although a number of ports in Brazil, the Gulf of Mexico region, the Middle-East,  
195 Australia, and parts of South-Korea and the Philippines have seen an increase in trade  
196 in 2020 relative to 2019. The top 20 port with the largest changes in volume in terms  
197 of total trade, imports and exports are included in Table 1. The ports with the largest  
198 absolute changes in volume are the ports of Ningbo (China, -68.5 MT), Rotterdam  
199 (Netherlands, -43.2 MT), Shanghai (China, -32.5 MT), Wuhan (China, -21.6 MT) and

200 Tubarao (Brazil, -20.7 MT). The largest changes in imports are found for the ports of  
201 Ningbo (China, -43.5 MT), Rotterdam (Netherlands, -40.1 MT), Shanghai (-22.4 MT),  
202 Zhoushan (China, -22.4 MT) and Amsterdam (Netherlands, -12.2 MT). These ports,  
203 and the other ports in the list, function as major gateway ports for a country to import  
204 final products (New York-New Jersey, Rotterdam), or are essential for specific supply-  
205 chains, such as textiles and electronics manufacturing (Shanghai, Ningbo, Zhoushan),  
206 steel and paper manufacturing (Ghent, Amsterdam, Rizhou), car manufacturing  
207 (Yokohama) and raw materials (coal imports for Krishnapatnam). The largest export  
208 changes are found for the ports of Ningbo (China, -25.0 MT), Tubarao (Brazil, -17.1  
209 MT), Novorossiysk (Russia, -11.5 MT), Wuhan (China, -10.8 MT), Beaumont (USA, -  
210 10.6 MT) and Dampier (Australia, -10.2 MT). These ports, and the other top 20 ports  
211 with largest export losses, are all important export ports for global supply-chains,  
212 including the exports of iron ore (Dampier, Tubarao), coal (Haypoint), oil and refined  
213 petroleum products (Puerto Bolivar, Fujairah, Beaumont and Novorossiysk) and  
214 manufacturing products (Ningbo, Wuhan and Shanghai).

215 Fig 1b-m show the changes in total trade per month for all ports and the cumulative  
216 changes in trade over latitude and longitude. In January, losses are predominantly  
217 pronounced in China that extended their Lunar New Year holiday [24], among other  
218 measures, resulting in output losses to the Chinese industry. This resulted in a direct  
219 demand shock, in particular for the export of raw materials (e.g. iron ore, copper, nickel)  
220 that China predominantly imports [25]. This can be observed from the large negative  
221 losses found in the large export ports of Brazil. In February, ports in Europe  
222 experienced their first drop in imports (blue line top plot), while export losses are still  
223 concentrated in Asia. This import drop in Europe coincided with the transit time from  
224 China to Europe, which is around three weeks. The export drop is, alongside Brazil,

225 also visible in the main iron ore exporting ports in Australia (Port Hedland and Port  
226 Walcott) and South Africa (Port of Richards Bay) that both supply iron ore to the  
227 Chinese industry. In March, exports temporally recovered, while imports dropped in  
228 many parts of the world, mainly to due to initiation of lockdowns in economies outside  
229 Asia. In particular, India, Malaysia, Singapore, USA West Coast and Mexico have seen  
230 a large drop in trade in this month. In April, trade partly recovers in the Northern  
231 Hemisphere, while in May the second drop in global trade hits the global economy, as  
232 a widespread reduction in demand and supply ripple through the economy. Losses are  
233 again pronounced in China and Western Europe, leading to the lowest total import and  
234 exports changes on a global scale. In June, July and August, a partial recovery is  
235 visible for some ports, while the Middle-East, Eastern Australia, Japan and Western  
236 Europe (in particular Belgium and the Netherlands) show large losses. For the Middle-  
237 Eastern countries, the collapse of the oil market has contributed to the large trade  
238 losses (which are predominantly exports losses). In August, signs of recovery  
239 (especially imports) are visible for the Philippines, India, South Africa, Brazil and  
240 Argentina, and parts of the Mediterranean, while other countries are still experiencing  
241 large losses.

242

243 **Fig 1. Port-level trade losses over time.** The geographical location and magnitude  
244 of trade losses for Jan-Aug 2020 compared to 2019, including the average over the  
245 eight months and the losses per month. Green = positive change, red = negative  
246 change. The subplots show the cumulative change over latitude and longitude for  
247 imports (dark blue) and exports (dark red).

248

249



250

251 **Table 1. Largest absolute trade losses on a port-level.** The top 20 total trade,

252 imports and export losses on a port-level expressed in million tonnes (MT). The losses

253 cover the period Jan-Aug 2020 compared to Jan-Aug 2019.

| Rank | Total trade  |      |             | Imports             |      |             | Exports        |      |             |
|------|--------------|------|-------------|---------------------|------|-------------|----------------|------|-------------|
|      | Port         | iso3 | Change (MT) | Port                | iso3 | Change (MT) | Port           | iso3 | Change (MT) |
| 1    | Ningbo       | CHN  | -68.5       | Ningbo              | CHN  | -43.5       | Ningbo         | CHN  | -25.0       |
| 2    | Rotterdam    | NLD  | -43.2       | Rotterdam           | NLD  | -40.1       | Tubarao        | BRA  | -17.1       |
| 3    | Shanghai     | CHN  | -32.5       | Shanghai            | CHN  | -22.4       | Novorossiysk   | RUS  | -11.5       |
| 4    | Wuhan        | CHN  | -21.6       | Zhoushan            | CHN  | -13.8       | Wuhan          | CHN  | -10.9       |
| 5    | Tubarao      | BRA  | -20.7       | Amsterdam           | NLD  | -12.2       | Beaumont       | USA  | -10.6       |
| 6    | Zhoushan     | CHN  | -18.8       | Rizhao              | CHN  | -11.3       | Dampier        | AUS  | -10.2       |
| 7    | Amsterdam    | NLD  | -17.4       | Wuhan               | CHN  | -10.7       | Shanghai       | CHN  | -10.1       |
| 8    | Shekou       | CHN  | -14.2       | Mina Al Ahmadi      | KWT  | -9.5        | Haypoint       | AUS  | -9.2        |
| 9    | Hong Kong    | HKG  | -12.3       | Vlissingen          | NLD  | -8.5        | Lumut          | MYS  | -7.6        |
| 10   | Vlissingen   | NLD  | -12.2       | Zhanjiang           | CHN  | -7.6        | Shekou         | CHN  | -7.5        |
| 11   | Singapore    | SGP  | -12.1       | Umm Said            | QAT  | -7.4        | Tianjin        | CHN  | -7.3        |
| 12   | Rizhao       | CHN  | -11.7       | Yokohama            | JPN  | -7.3        | Fujairah       | ARE  | -7.2        |
| 13   | Novorossiysk | RUS  | -11.7       | Ghent               | BEL  | -7.1        | Tangshan       | CHN  | -6.3        |
| 14   | Lumut        | MYS  | -11.6       | Singapore           | SGP  | -6.8        | Xiamen         | CHN  | -6.1        |
| 15   | Dampier      | AUS  | -10.8       | Hong Kong           | HKG  | -6.7        | Itaqui         | BRA  | -5.8        |
| 16   | Yokohama     | JPN  | -9.9        | Shekou              | CHN  | -6.7        | Bohai Bay      | CHN  | -5.7        |
| 17   | Haypoint     | AUS  | -9.7        | Krishnapatnam       | IND  | -6.7        | Puerto Bolivar | COL  | -5.7        |
| 18   | Beaumont     | USA  | -9.5        | Magdalla            | IND  | -6.6        | Hong Kong      | HKG  | -5.6        |
| 19   | Ghent        | BEL  | -9.4        | Port of Le Havre    | FRA  | -6.4        | Primorsk       | RUS  | -5.5        |
| 20   | Zhanjiang    | CHN  | -9.1        | New York-New Jersey | USA  | -6.0        | Richards Bay   | ZAF  | -5.4        |

254

255

256

257

258

259

260

261

262

## 263 **Geographical disparity**

264 Fig 2a-b show the country-aggregated relative changes in imports and exports, with  
265 the top 20 largest negative (relative) changes included in Table 2 and largest negative  
266 absolute changes in S1 Table. The top 20 largest total trade losses range between 17-  
267 36%. The largest percentage change in imports are associated with small economies  
268 such as Turks and Caicos Islands, the Caribbean Netherlands, Bahrain, Anguilla,  
269 Federated States of Micronesia and Madagascar (all between 28-37% reduction). Most  
270 of the countries with the largest import losses are Small Island Developing States,  
271 which are characterised by having large import-dependencies due to their small  
272 domestic economies, being reliant on maritime trade flows for trade, and importing  
273 large amount of goods to support the tourism sector that constitutes a large share of  
274 the country's GDP [26]. With the tourist industry collapsing due to the COVID-19  
275 outbreak [27], the imports are expected to drop further significantly, explaining the  
276 widespread reductions observed. Other countries, like a number of countries in Africa,  
277 Myanmar, Oman, Philippines, the Baltic States and Sweden have increased their  
278 imports, likely due to the increased need for food and medical supplies in developing  
279 nations or increased household consumption in some developed countries. In terms of  
280 exports, the largest relative losses are found for Libya, New Caledonia, Guinea-Bissau,  
281 Northern Mariana Islands, Cape Verde and Sudan (all between 50-78% reduction).  
282 These countries include many raw materials exporting countries that have suffered  
283 from the demand shock across the world, in particular through trade dependencies with  
284 Europe, China and the United States [28]. Moreover, many low income countries had  
285 to pro-actively lockdown economies to protect their health care system, or are engaged  
286 in economic activities that are less able to be done remotely [28,29]. Some countries

287 have increased their exports, such as India, Myanmar, Vietnam and Philippines,  
288 potentially because of production shifts of manufacturing goods to these countries  
289 when factory shut down in China [30]. Moreover, exports grew in Argentina, mainly due  
290 to booming exports of food products (e.g. soybeans, beef) to the United States and  
291 China [31], and in Tanzania, which increased its exports of gold and food (e.g. nuts)  
292 and textile products (e.g. cotton) [32].

293 Using the World Bank income classification, we test whether high and upper middle  
294 income countries have experienced more severe impacts than low and lower middle  
295 income countries. Without excluding outliers from the data, we find a significant  
296 difference (two-sided t-test with  $p > 0.05$ ) between both income groups for exports and  
297 imports, with high and upper middle income countries having higher export losses.  
298 Hence, although the high and upper middle income countries have higher mean export  
299 losses, the most extreme export losses and gains are found for low and lower middle  
300 income countries.

301

302 **Fig 2. Country-level relative trade losses.** The relative trade losses for Jan-Aug 2020  
303 compared to 2019 expressed in percentage change. Grey countries indicate no data  
304 available.

305

306

307

308

309

310

311 **Table 2. Largest relative trade losses on a country-level.** The total trade, imports  
312 and export losses on a country-level expressed in million tonnes (MT). The losses  
313 cover the period Jan-Aug 2020 compared to Jan-Aug 2019.

| Rank | Total trade                          |            | Imports                                 |            | Exports                                |            |
|------|--------------------------------------|------------|-----------------------------------------|------------|----------------------------------------|------------|
|      | Country                              | Change (%) | Country                                 | Change (%) | Country                                | Change (%) |
| 1    | Anguilla                             | -35.6      | Turks and<br>Caicos Islands             | -36.9      | Libya                                  | -77.8      |
| 2    | Libya                                | -34.3      | Bonaire, Saint<br>Eustatius and<br>Saba | -35.9      | New Caledonia                          | -64.9      |
| 3    | Federated States of<br>Micronesia    | -33.5      | Bahrain                                 | -31.3      | Guinea-Bissau                          | -55.6      |
| 4    | Cape Verde                           | -30.6      | Anguilla                                | -30.7      | Northern Mariana<br>Islands            | -54.9      |
| 5    | Peru                                 | -28.3      | Federated<br>States of<br>Micronesia    | -29.8      | Cape Verde                             | -53.7      |
| 6    | Bonaire, Saint<br>Eustatius and Saba | -26.8      | Madagascar                              | -28.4      | Sudan                                  | -49.4      |
| 7    | Malta                                | -26.2      | Timor-Leste                             | -26.0      | Montenegro                             | -45.1      |
| 8    | Eritrea                              | -26.1      | Malta                                   | -25.7      | Eritrea                                | -44.6      |
| 9    | Madagascar                           | -25.1      | Grenada                                 | -22.4      | Dem. Republic<br>Congo                 | -44.3      |
| 10   | Montenegro                           | -24.9      | Belize                                  | -22.3      | Vanuatu                                | -40.0      |
| 11   | Turks and Caicos<br>Islands          | -24.8      | Iran                                    | -21.8      | Kenya                                  | -39.6      |
| 12   | Vanuatu                              | -24.4      | Seychelles                              | -21.5      | Peru                                   | -39.2      |
| 13   | Seychelles                           | -23.7      | French<br>Polynesia                     | -21.1      | Federated States<br>of Micronesia      | -38.4      |
| 14   | Timor-Leste                          | -23.3      | Aruba                                   | -19.8      | American Samoa                         | -34.9      |
| 15   | Northern Mariana<br>Islands          | -22.2      | Vanuatu                                 | -19.4      | Albania                                | -32.6      |
| 16   | French Polynesia                     | -21.1      | Iraq                                    | -19.3      | Seychelles                             | -28.0      |
| 17   | Iraq                                 | -20.1      | Kuwait                                  | -19.0      | Malta                                  | -27.2      |
| 18   | New Caledonia                        | -19.3      | Macau                                   | -18.3      | Yemen                                  | -25.8      |
| 19   | Bulgaria                             | -19.1      | Bulgaria                                | -17.4      | Romania                                | -25.6      |
| 20   | Romania                              | -17.6      | Cape Verde                              | -17.2      | Saint Vincent<br>and the<br>Grenadines | -23.7      |

314

315

316

317

318

## 319 **Time series of total and sector-specific trade changes**

320 The total trade losses are not uniform across sectors. Fig 3 shows the estimated total  
321 trade losses over time (Fig 3a) together with the trade losses for the 11 sector  
322 classification considered. The total trade losses are found to be between -7.0% and -  
323 9.6% (mean -8.3%), which is equal to around 206-286 MT in volume losses and up to  
324 225-412 billion USD in trade value (uncertainty due to differences in total import and  
325 export losses and due to the volume to value conversion). The time series show (Fig  
326 3a) a clear initial drop in trade in the first three months, after which trade partly  
327 recovers, followed by a second, more pronounced, drop in trade. In late August 2020,  
328 a sign of economic recovery is not yet visible.

329 Some supply-chains have been more resilient than others. The most resilient sectors  
330 are found to be Textiles and wearing apparel (-4.1%), Food and beverages (-5.8%),  
331 Other manufacturing (-6.0%) and Wood and paper (-6.3%). The times series of Textiles  
332 and wearing apparel and Other manufacturing show, however, a large drop in exports  
333 in the early stages of the pandemic, mainly associated with production in China and  
334 other Asian economies (e.g. Bangladesh, Malaysia), followed by a gradual recovery  
335 and a less steep second drop. The Wood and paper and Food and beverages sectors  
336 have been more stable throughout pandemic outbreak, as supply-chains were not  
337 significantly disrupted, and demand for products only gradually declined, followed by  
338 signs of a recovery at the end of August. The largest relative changes are found for the  
339 Fishing sector (-9.5%), Mining and quarrying (-9.0%), Manufacturing of electronics and  
340 machinery (-8.8%), and Manufacturing of transport equipment (-11.8%). The drop in  
341 fishing products peaked late in the pandemic with a clear recovery in July and August.  
342 The time series of the mining and quarrying sector shows a more complex picture with  
343 a sharp drop in the beginning of the pandemic, as demand for raw materials decreased

344 in Asia, followed by a steep increase in trade to restock inventories, after which a total  
345 collapse of the market can be observed, mainly associated with reduced demand for  
346 oil. For the two manufacturing sectors, the large losses are the result of significant  
347 supply-chain disruptions that caused upstream production processes to halt due to a  
348 shortage in supplies [8]. In particular the Transport manufacturing industry,  
349 characterised by just-in-time logistic services and highly specialised production  
350 processes, experienced a gradual disruption throughout the first few months, after  
351 which trade declined more than 20% in May, June and July.

352

353 **Fig 3. Sector-specific losses over time.** The change in daily global total trade as a  
354 fraction of the average daily trade (over 2019). The dark blue line represent imports,  
355 the dark red line represent exports, whereas the grey line indicate total trade (import +  
356 exports). Sector 1: Agriculture; Sector 2: Fishing; Sector 3: Mining and quarrying;  
357 Sector 4: Food and beverages; Sector 5: Textiles and wearing apparel; Sector 6: Wood  
358 and paper; Sector 7: Petroleum, chemical and non-metallic mineral products; Sector  
359 8: Metal products; Sector 9: Electrical and machinery; Sector 10: Transport equipment;  
360 Sector 11: Other manufacturing.

361

## 362 **Impact of large-scale containment measures**

363 The results of the panel regression model are included in [Table 1](#). After testing various  
364 model specifications (S1 Appendix), we find the most robust results for the model that  
365 includes daily control variables for the number of confirmed cases as a fraction of the  
366 population (Cases), demand reduction in trade dependent countries (Demand), the  
367 potential supply disruptions through changes in import that are used for exports

368 (Supply), and potential other factors that are autocorrelated with the changes in export  
369 (Export lag).

370 The effect of the composite index on daily export change is strong, and statistically  
371 significant ( $p < 0.01$ ), with a 10% increase of the index resulting in a -0.45% change in  
372 exports (Model 1).

373 The influence of containment measures on exports is mixed with some measures  
374 showing a negative impact while others showing a positive impact (Model 2). Negative  
375 impacts are found for school closing (C1, ~~-2.63%~~, significant at  $p < 0.05$ ), workplace  
376 closure (C2, ~~-4.76%~~, significant at  $p < 0.01$ ) and closing of public transport (C5, ~~-3.59%~~  
377 significant at  $p < 0.01$ ). Surprisingly, a positive effect is found for stay at home  
378 requirements (C6, ~~+2.74%~~, significant at  $p < 0.10$ ), restrictions on internal movement  
379 (C7, ~~+2.17%~~, significant at  $p < 0.10$ ). Hence, implementing some policies has enabled  
380 countries to continue producing export goods and transport them to their ports,  
381 although the signal is generally not strong.

382 The results are potentially biased because of the fact that containment measures may  
383 affect domestic production in a lagged manner. In S2 Appendix, we perform additional  
384 robustness tests by introducing a 4/8/12/16 day lag of the containment policies. This  
385 increases the negative effect of school closures, which varies between -3.36% and -  
386 6.87% depending on the lag (all significant at  $p < 0.01$ ), while it increases the positive  
387 effect of international travel bans for lags of 8 – 16 days (between +2.85% and 6.03%,  
388 significant at  $p < 0.01$ ).

389 Additionally, we run a model (Model 3 and 4 that includes daily dummy variables to  
390 account for economy-wide factors that affect maritime exports) and a model (Model 5  
391 and 6) which include only the days where the outbreak become significant in a country  
392 (which we define as having at least 50 confirmed cases). This coefficient of the

393 composite index is stable across models (-4.53% versus -4.94% and -4.72%, Model 3  
394 and 5). For the individual containment measures, the effect of school closures is larger  
395 in Model 4 (-2.63%, significant at  $p < 0.05$ ) and Model 6 (-6.53%, significant at  $p <$   
396  $0.01$ ). The positive effect of testing is enhanced in Model 6 (+2.83%, significant at  $p$   
397  $< 0.05$ ), whereas the positive effect of stay at home policies becomes larger and  
398 statistically significant in Model 4 and 6 (+2.74%, significant at  $p < 0.10$ ; +6.53%,  
399 significant at  $p < 0.01$ ). The results change little when performing additional robust  
400 checks by modifying the number of days of the lag of the export and adding week  
401 dummies (instead of day dummies) to the model (see S2 Appendix).

402 Across all model specifications, we find a consistent negative relationship between the  
403 overall stringency index and maritime exports, and business and public transport  
404 closures and maritime exports, whereas all other policies are either not significant, or  
405 not consistently significant across different model specifications.

406  
407  
408  
409  
410  
411  
412  
413  
414  
415  
416



417 **Table 3. The results of the various regression models.** The table shows the  
 418 estimated beta coefficients and goodness of fit statistics for the six model specifications  
 419 discussed. \*p < 0.1, \*\*p < 0.05, \*\*\*p < 0.01

|             | <b>Model1</b> | <b>Model2</b> | <b>Model3</b> | <b>Model4</b> | <b>Model5</b> | <b>Model6</b> |
|-------------|---------------|---------------|---------------|---------------|---------------|---------------|
| Parameter   | Beta          | Beta          | Beta          | Beta          | Beta          | Beta          |
| Composite   | -4.527***     |               | -4.939***     |               | -4.717***     |               |
| C1          |               | -1.969        |               | -2.630**      |               | -6.531***     |
| C2          |               | -4.703***     |               | -4.755***     |               | -3.006*       |
| C3          |               | 0.557         |               | 0.381         |               | 1.298         |
| C4          |               | -0.613        |               | -0.822        |               | -2.114        |
| C5          |               | -3.588***     |               | -3.500***     |               | -5.429***     |
| C6          |               | 2.049         |               | 2.740*        |               | 6.525***      |
| C7          |               | 2.173**       |               | 2.191*        |               | 1.377         |
| C8          |               | 1.825         |               | 1.995         |               | 3.771         |
| H2          |               | 0.890         |               | 0.728         |               | 2.833**       |
| Demand      | -0.015        | -0.033        | -0.016        | -0.014        | 0.005         | -0.022        |
| Cases       | -0.129**      | -0.113*       | -0.130*       | -0.124*       | -0.393***     | -0.427***     |
| Supply      | 0.018***      | 0.018***      | 0.018***      | 0.018***      | -0.003        | -0.002        |
| Export lag  | 0.350***      | 0.349***      | 0.351***      | 0.350***      | 0.402***      | 0.399***      |
| R2          | 0.320         | 0.321         | 0.329         | 0.330         | 0.359         | 0.361         |
| R2-adjusted | 0.316         | 0.316         | 0.318         | 0.319         | 0.353         | 0.355         |
| F-statistic | 73.67         | 69.23         | 29.84         | 29.20         | 64.74         | 61.18         |

420

421

## 422 **Discussion and conclusion**

423 We present a near-global analysis of maritime trade indicators based on empirical  
 424 vessel tracking data. We illustrate how the implementation of large-scale containment  
 425 measures have resulted in large trade losses, and hence domestic output, with a strong  
 426 geographical and sectoral heterogeneity.

427 Our estimate of a 4.4% reduction in global ports calls for the first eight months of 2020  
 428 is lower than the 8.7% predicted by UNCTAD for the first six months [14]. The main  
 429 reason for this difference is associated with the inclusion of different vessel types.

430 Whereas we include only the main trade-carrying vessels, the UNCTAD analysis also

431 included passengers vessels (66% of total port calls), which have seen the largest drop  
432 in port calls (-17% for passenger vessels). Moreover, the sector-level trends we found  
433 are in line with the sector-level impacts (based observed trade data of China, the  
434 European Union and the United States) for the first quarter (Q1) of 2020 as presented  
435 in the UNCTAD analysis [14], that stated that in particular the automotive industry (-  
436 8%), machinery (-8%), office machinery (-8%) and textiles and apparel (-11%) are  
437 particularly hit. Our analysis, which differs by only including maritime trade (instead of  
438 total trade) and having a global scale (instead of three countries), found the average  
439 losses in Q1 for the textiles and apparel (Sector 5), electrical equipment and machinery  
440 manufacturing (Sector 9), transport equipment (Sector 10) and other manufacturing  
441 (Sector 11) to be respectively 6.2%, 9.2%, 6.5% and 8.4%. The trade losses we  
442 estimate (225-412 billion USD for the first eight months) are considerably lower than  
443 reported in the modelling framework of Lenzen et al. [7], who estimated the trade  
444 losses for the first five months of 2020 to be 536 billion USD. Again, part of this  
445 difference is due to the coverage of countries (they provide a full global analysis) and  
446 modes of transport (all modes compared to maritime only). Still, input-output based  
447 analysis, as done in Lenzen et al. [7], often fail to consider adaptative behaviour in the  
448 global economic system, which can dampen economic impacts [33]. The -8.6% trade  
449 losses we found are also lower than the 26.8%, and up to 31%, value-added losses  
450 (although not being directly comparable) reported in the global pandemic scenarios of  
451 Guan et al. [6]. We expect the percentage change in trade losses to increase going  
452 further in 2020, as daily trade losses are above 10% at the end of August. This is in  
453 line with projections of the UNCTAD [14] and the WTO [10] that estimate a further  
454 contraction of merchandise trade in the second half of 2020.

455 The results of the econometric model provide an alternative view to the studies that  
456 have evaluated the effect of large-scaled containment measures on the spread of the  
457 virus [1,2,4,34]. We find clear evidence of the negative impacts of large-scale  
458 containment measures on changes in daily exports, with a 10% increase in the overall  
459 stringency value resulting in a 0.45%-0.50% decrease in daily maritime exports. In  
460 particular, introducing required closing of all public transport and all-but-essential  
461 businesses resulted in large maritime export losses of up to 5.4-6.5% of daily export.  
462 This is in agreement with Deb et al. [5], who used nitrogen emissions as an indicator  
463 of industrial output and found that workplace closures had the largest influence on the  
464 drop in emissions. Results should, however, be interpreted with caution, as many  
465 factors could potentially influence these causal relationships. For instance, temporal  
466 increases in maritime transport during some periods of the pandemic could be driven  
467 by the large increase in trade of medical supplies (e.g. PPE) and mode substitution  
468 from air to maritime [35], irrespective if policies were imposed during these periods.  
469 Therefore, testing alternative economic indicators, such as data on retail sales,  
470 mobility, flight, energy consumption and nitrogen emissions, as done in Deb et al. [5]  
471 can help support these findings. Overall, our analysis of the economic implications of  
472 introducing containment policies into society can help evaluating the cost-benefit of the  
473 different containments measures, which may help governments construct effective  
474 portfolios of policies as many countries enter a second-wave of COVID-19 cases [36].  
475 Future work can refine our estimates by adding more trade data when it becomes  
476 available, including extending the analysis to indicators of air, road and rail transport.  
477 Moreover, the empirical estimates derived here can be used to constrain and validate  
478 macro-economic impact models in order to improve the quantification of the total losses  
479 to industrial output as the pandemic unfolds.

480 Overall, real-time indicators of economic activity, such as maritime trade, can help  
481 identify trends in supply-chains networks and support governments and international  
482 organisations in their economic recovery efforts by allocating funds to the hardest hit  
483 economies and sectors.

484

## 485 **Acknowledgements**

486 All derived datasets used for this analysis are made publicly available at Zenodo:  
487 10.5281/zenodo.4146993 and will be published upon acceptance. The policy  
488 indicators are obtained from the Oxford Coronavirus Government Response Tracker  
489 ([https://www.bsg.ox.ac.uk/research/research-projects/coronavirus-government-  
490 response-tracker](https://www.bsg.ox.ac.uk/research/research-projects/coronavirus-government-response-tracker)).

491 The authors would like to thank the United Nations Statistical Division and the UN  
492 Global Working Group on Big Data for Official Statistics, in particular Markie Muryawan  
493 and Ronald Jansen, for providing the AIS data.

494

## 495 **Supporting information**

496 **S1 Appendix: Methodology maritime trade estimates**

497 **S2 Appendix: Econometric model**

498 **S1 Table. The top 20 largest negative maritime trade losses on a country-level.**

499 The total trade, imports and exports losses expressed in million tonnes (MT). The  
500 losses cover the period Jan-Aug 2020 compared to Jan-Aug 2019.

501

502

503

505 **References**

- 506 1. Hsiang S, Allen D, Annan-Phan S, Bell K, Bolliger I, Chong T, et al. The effect  
507 of large-scale anti-contagion policies on the COVID-19 pandemic. *Nature*.  
508 2020. doi:10.1038/s41586-020-2404-8
- 509 2. Kraemer MUG, Yang C-H, Gutierrez B, Wu C-H, Klein B, Pigott DM, et al. The  
510 effect of human mobility and control measures on the COVID-19 epidemic in  
511 China. *Science* (80- ). 2020;21: eabb4218. doi:10.1126/science.abb4218
- 512 3. Chinazzi M, Davis JT, Ajelli M, Gioannini C, Litvinova M, Merler S, et al. The  
513 effect of travel restrictions on the spread of the 2019 novel coronavirus  
514 (COVID-19) outbreak. *Science*. 2020;9757: 1–12.  
515 doi:10.1126/science.aba9757
- 516 4. Tian H, Liu Y, Li Y, Wu C-H, Chen B, Kraemer MUG, et al. An investigation of  
517 transmission control measures during the first 50 days of the COVID-19  
518 epidemic in China. *Science* (80- ). 2020;368: 638–642.  
519 doi:10.1126/science.abb6105
- 520 5. Deb P, Furceri D, Ostry JD, Tawk N. The economic effects of COVID-19  
521 containment measures. *Covid Econ Vetted Real-Time Pap*. 2020;24: 32–35.
- 522 6. Guan D, Wang D, Hallegatte S, Davis SJ, Huo J, Li S, et al. Global supply-  
523 chain effects of COVID-19 control measures. *Nat Hum Behav*. 2020.  
524 doi:10.1038/s41562-020-0896-8
- 525 7. Lenzen M, Li M, Malik A, Pomponi F, Sun Y-Y, Wiedmann T, et al. Global  
526 socio-economic losses and environmental gains from the Coronavirus  
527 pandemic. *PLoS One*. 2020;15: e0235654. doi:10.1371/journal.pone.0235654
- 528 8. Inoue H, Todo Y. The propagation of economic impacts through supply chains:

- 529 The case of a mega-city lockdown to prevent the spread of COVID-19. Xing L,  
530 editor. PLoS One. 2020;15: e0239251. doi:10.1371/journal.pone.0239251
- 531 9. McKibbin WJ, Fernando R. The Global Macroeconomic Impacts of COVID-19:  
532 Seven Scenarios. SSRN Electron J. 2020. doi:10.2139/ssrn.3547729
- 533 10. WTO. Methodology for the WTO Trade Forecast of April 8 2020. 2020.
- 534 11. Cheng C, Barceló J, Hartnett AS, Kubinec R, Messerschmidt L. COVID-19  
535 Government Response Event Dataset (CoronaNet v.1.0). Nat Hum Behav.  
536 2020;4: 756–768. doi:10.1038/s41562-020-0909-7
- 537 12. Henriët F, Hallegatte S, Tabourier L. Firm-network characteristics and  
538 economic robustness to natural disasters. J Econ Dyn Control. 2012;36: 150–  
539 167. doi:10.1016/j.jedc.2011.10.001
- 540 13. Inoue H, Todo Y. Propagation of negative shocks across nationwide firm  
541 networks. PLoS One. 2019;14: 1–17. doi:10.1371/journal.pone.0213648
- 542 14. UNCTAD. COVID-19 and maritime transport : Impact and responses. Geneva;  
543 2020. Report No.: UNCTAD/DTL/TLB/INF/2020/1.
- 544 15. UNCTAD. Review of Maritime Transport 2017 - Developments in International  
545 Seaborn Trade. 2017.
- 546 16. Verschuur J, Koks EE, Hall JW. Port disruptions due to natural disasters:  
547 Insights into port and logistics resilience. Transp Res Part D Transp Environ.  
548 2020;85: 102393. doi:10.1016/j.trd.2020.102393
- 549 17. Adland R, Jia H, Strandenes SP. Are AIS-based trade volume estimates  
550 reliable? The case of crude oil exports. Marit Policy Manag. 2017;44: 657–665.  
551 doi:10.1080/03088839.2017.1309470
- 552 18. Arslanalp S, Marini M, Tumbarello P. Big Data on Vessel Traffic: Nowcasting  
553 Trade Flows in Real Time. IMF Work Pap. 2019;2019.

- 554 doi:10.5089/9781513521121.001
- 555 19. Cerdeiro DA, Komaromi A, Liu Y, Saeed M. World Seaborne Trade in Real  
556 Time : A Proof of Concept for Building AIS-based Nowcasts from Scratch.  
557 2020. Report No.: WP/20/XX World.
- 558 20. United Nations Statistical Division. UN Comtrade database. In: UN Comtrade  
559 database [Internet]. 2020 [cited 1 Feb 2020]. Available: <https://comtrade.un.org>
- 560 21. Petherick A, Hale T, Phillips T, Webster S. Variation in government responses  
561 to COVID-19 | Blavatnik School of Government. 2020. Available:  
562 [https://www.bsg.ox.ac.uk/research/publications/variation-government-](https://www.bsg.ox.ac.uk/research/publications/variation-government-responses-covid-19)  
563 [responses-covid-19](https://www.bsg.ox.ac.uk/research/publications/variation-government-responses-covid-19)
- 564 22. Romer CD, Romer DH. The macroeconomic effects of tax changes: Estimates  
565 based on a new measure of fiscal shocks. *Am Econ Rev.* 2010;100: 763–801.  
566 doi:10.1257/aer.100.3.763
- 567 23. Hummels D, Ishii J, Yi KM. The nature and growth of vertical specialization in  
568 world trade. *J Int Econ.* 2001;54: 75–96. doi:10.1016/S0022-1996(00)00093-3
- 569 24. Chen S, Yang J, Yang W, Wang C, Bärnighausen T. COVID-19 control in  
570 China during mass population movements at New Year. *Lancet.* 2020;395:  
571 764–766. doi:10.1016/S0140-6736(20)30421-9
- 572 25. Mathews JA, Tan H. Circular economy: Lessons from China. *Nature.* 2016;531:  
573 440–442. doi:10.1038/531440a
- 574 26. Briguglio L. Small island developing states and their economic vulnerabilities.  
575 *World Dev.* 1995;23: 1615–1632. doi:10.1016/0305-750X(95)00065-K
- 576 27. Gössling S, Scott D, Hall CM. Pandemics, tourism and global change: a rapid  
577 assessment of COVID-19. *J Sustain Tour.* 2020;0: 1–20.  
578 doi:10.1080/09669582.2020.1758708

- 579 28. Gondwe G. Assessing the Impact of COVID-19 on Africa's Economic  
580 Development. 2020. Available:  
581 [https://unctad.org/en/PublicationsLibrary/aldcmisc2020d3\\_en.pdf](https://unctad.org/en/PublicationsLibrary/aldcmisc2020d3_en.pdf)
- 582 29. Adam C, Henstridge M, Lee S. After the lockdown: macroeconomic adjustment  
583 to the COVID-19 pandemic in sub-Saharan Africa. *Oxford Rev Econ Policy*.  
584 2020. doi:10.1093/oxrep/graa023
- 585 30. Nikkei Asian Review. Google, Microsoft shift production from China faster due  
586 to virus. In: *Coronavirus* [Internet]. 2020 [cited 1 Jul 2020]. Available:  
587 [https://asia.nikkei.com/Spotlight/Coronavirus/Google-Microsoft-shift-production-](https://asia.nikkei.com/Spotlight/Coronavirus/Google-Microsoft-shift-production-from-China-faster-due-to-virus)  
588 [from-China-faster-due-to-virus](https://asia.nikkei.com/Spotlight/Coronavirus/Google-Microsoft-shift-production-from-China-faster-due-to-virus)
- 589 31. Buenos Aires Times. China overtook Brazil as Argentina's largest trading  
590 partner in April. In: *Economy* [Internet]. 2020 [cited 1 Sep 2020]. Available:  
591 [https://www.batimes.com.ar/news/economy/china-overtook-brazil-as-](https://www.batimes.com.ar/news/economy/china-overtook-brazil-as-argentinas-largest-trading-partner-in-april.phtml)  
592 [argentinas-largest-trading-partner-in-april.phtml](https://www.batimes.com.ar/news/economy/china-overtook-brazil-as-argentinas-largest-trading-partner-in-april.phtml)
- 593 32. Tanzania Invest. Tanzania Exports Up 15% in April 2020. In: *Tanzania Trade*  
594 [Internet]. 2020 [cited 1 Oct 2020]. Available:  
595 <https://www.tanzaniainvest.com/economy/trade/exports-april-2020>
- 596 33. Koks EE, Thissen M. A Multiregional Impact Assessment Model for disaster  
597 analysis. *Econ Syst Res*. 2016;28: 429–449.  
598 doi:10.1080/09535314.2016.1232701
- 599 34. Giordano G, Blanchini F, Bruno R, Colaneri P, Di Filippo A, Di Matteo A, et al.  
600 Modelling the COVID-19 epidemic and implementation of population-wide  
601 interventions in Italy. *Nature Medicine*. Springer US; 2020. doi:10.1038/s41591-  
602 020-0883-7
- 603 35. Freightwaves. More air cargo finds its sea legs during COVID-19. 2020 [cited 7



604 Oct 2020]. Available: [https://www.freightwaves.com/news/more-air-cargo-finds-](https://www.freightwaves.com/news/more-air-cargo-finds-its-sea-legs-during-covid-19)  
605 [its-sea-legs-during-covid-19](https://www.freightwaves.com/news/more-air-cargo-finds-its-sea-legs-during-covid-19)  
606 36. Cacciapaglia G, Cot C, Sannino F. Second wave COVID-19 pandemics in  
607 Europe: A Temporal Playbook. Sci Rep. 2020; 1–8. doi:10.1038/s41598-020-  
608 72611-5  
609

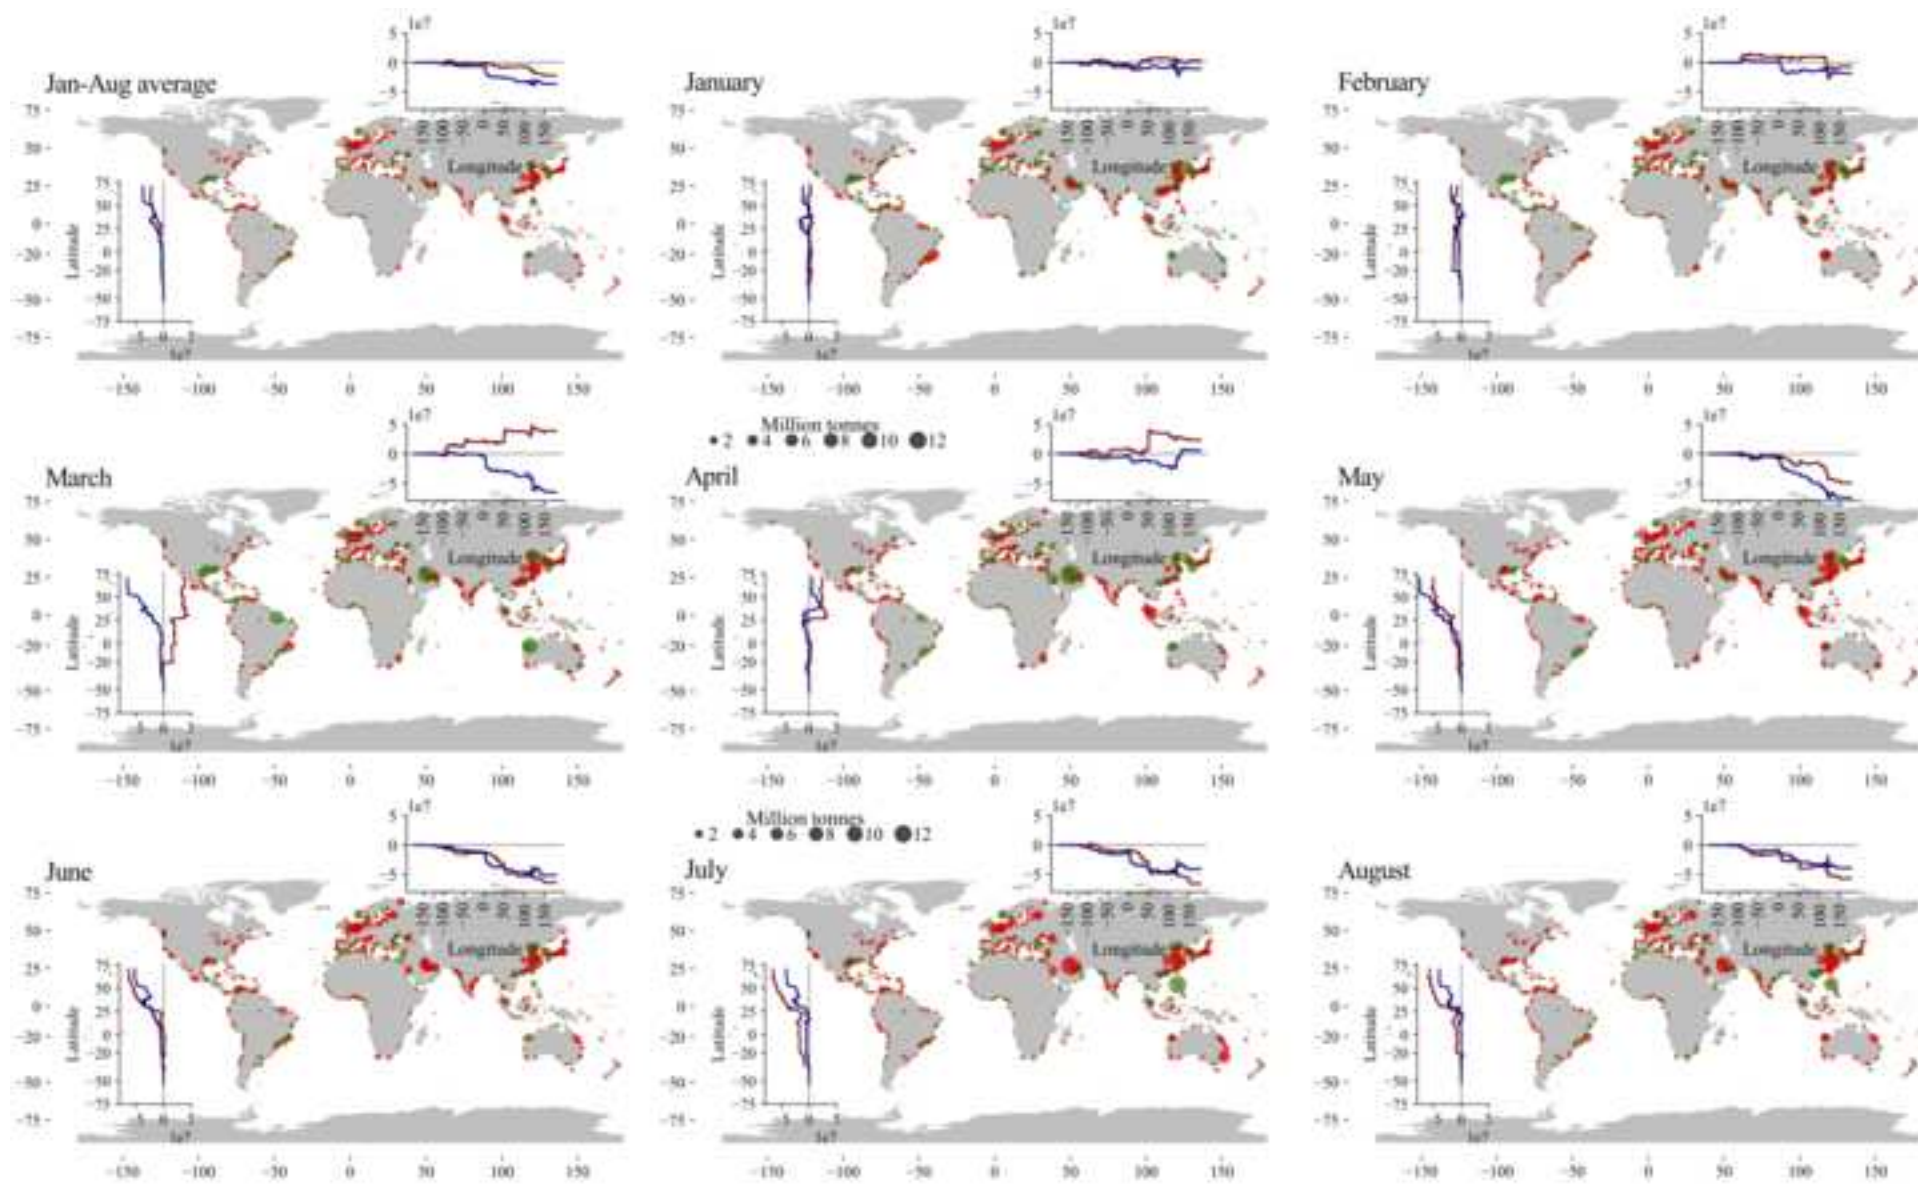

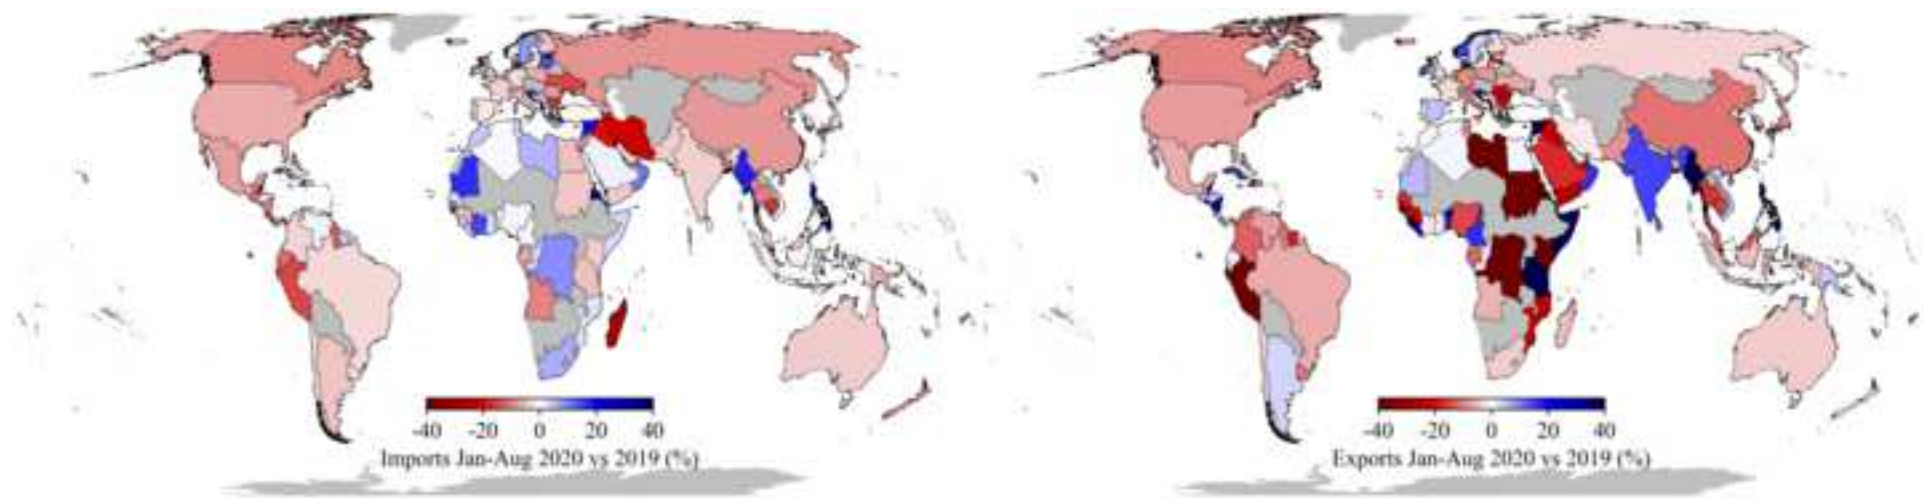

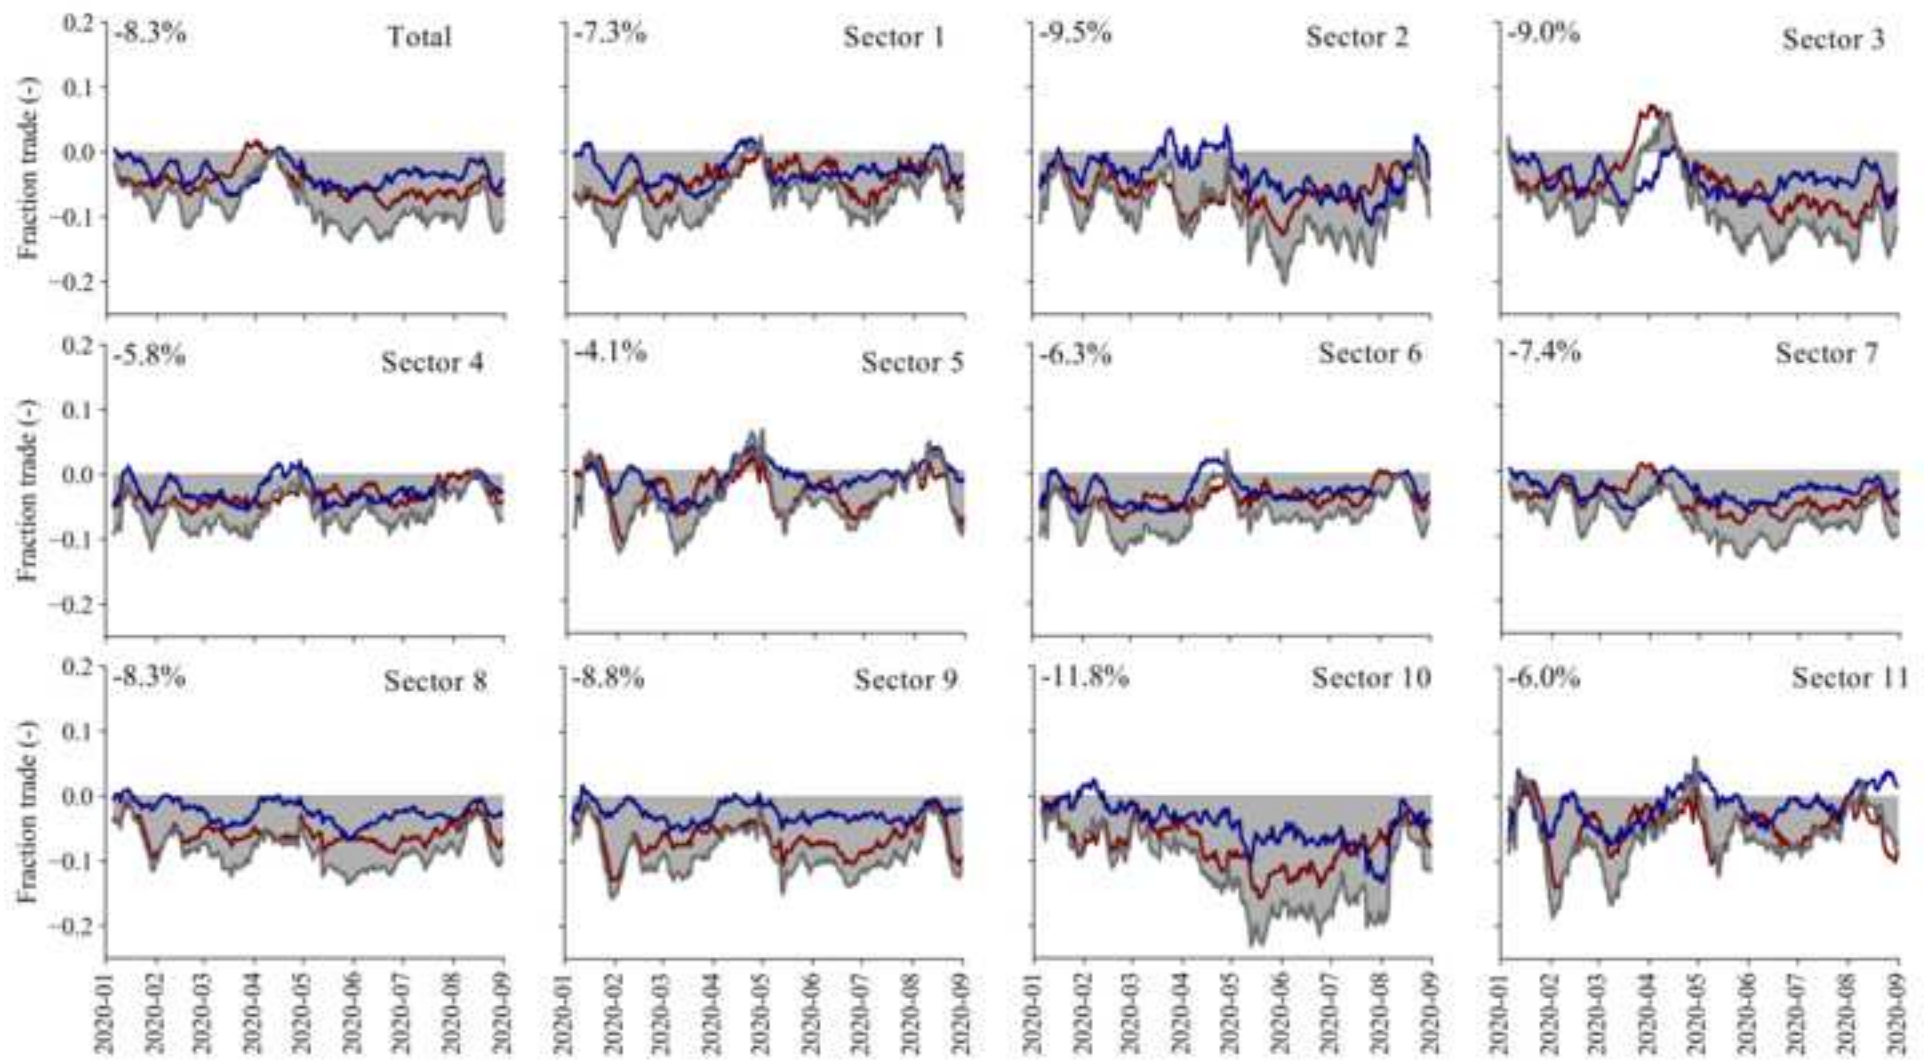

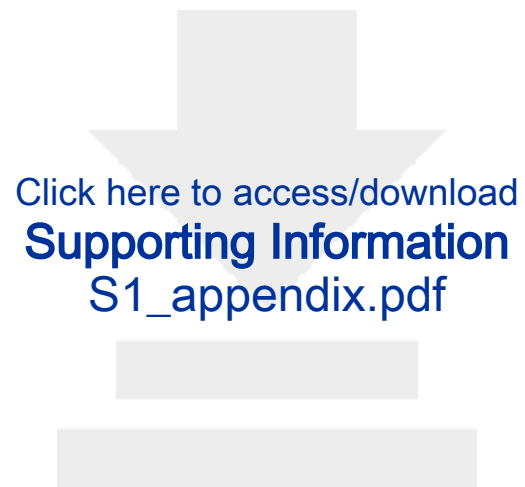

Click here to access/download  
**Supporting Information**  
S1\_appendix.pdf

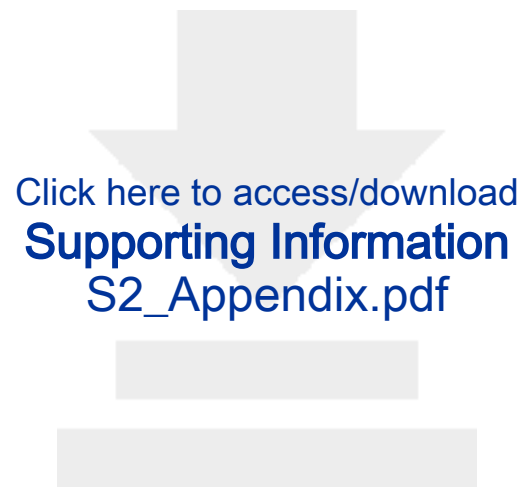

Click here to access/download  
**Supporting Information**  
S2\_Appendix.pdf

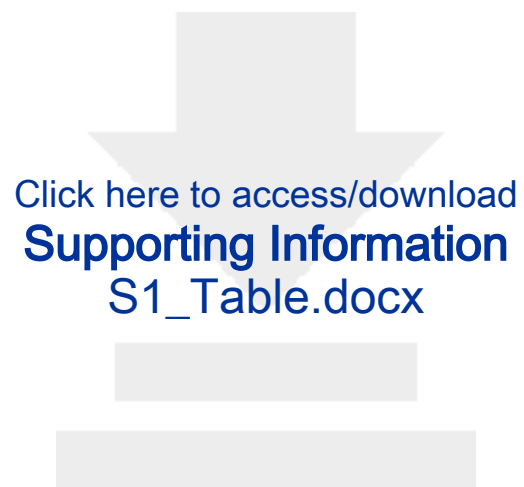

Click here to access/download  
**Supporting Information**  
S1\_Table.docx
